# Supplementary material
Source: PubMed Central journal article supplement (PMC5278172)
Supplement: IAI.00832-16_zii999091951s1.pdf [file IAI.00832-16_zii999091951s1.pdf]

**Table S1. Strains used in this study**

| Strain             | Name       | Genotype                                                                            | Reference  |
|--------------------|------------|-------------------------------------------------------------------------------------|------------|
| SC5314             |            | Wild type                                                                           | (1)        |
| <i>ahr1Δ</i>       | SVC22      | <i>ahr1Δ::FRT/ahr1Δ::FRT</i>                                                        | this study |
| <i>ahr1Δ</i>       | SVC23      | <i>ahr1Δ::FRT/ahr1Δ::FRT</i>                                                        | This study |
| <i>ahr1Δ+AHR1</i>  | SVC27      | <i>ahr1Δ::FRT/ahr1Δ::FRT RPS10/rps10::AHR1</i>                                      | This study |
| <i>ahr1Δ stp2Δ</i> | SVC25      | <i>ahr1Δ::FRT/ahr1Δ::FRT/stp2Δ::FRT/stp2Δ::FRT/<br/>stp2Δ::FRT</i>                  | this study |
| <i>ahr1Δ stp2Δ</i> | SVC26      | <i>ahr1Δ::FRT/ahr1Δ::FRT/stp2Δ::FRT/stp2Δ::FRT/<br/>stp2Δ::FRT</i>                  | This study |
| <i>stp2Δ</i>       | SVC17      | <i>stp2Δ::FRT/stp2Δ::FRT/ stp2Δ::FRT</i>                                            | (2)        |
| <i>stp2Δ+STP2</i>  | SVC21      | <i>stp2Δ::FRT/stp2Δ::FRT/ stp2Δ::FRT<br/>RPS10/rps10::STP2</i>                      | (2)        |
| <i>ssy1Δ</i>       | CaPM0<br>7 | <i>ssy1Δ::FRT/ssy1Δ::FRT</i>                                                        | (3)        |
| <i>ssy1Δ+SSY1</i>  | CaPM2<br>5 | <i>ssy1Δ::FRT/ssy1Δ::FRT RPS10/rps10::Clp10-SSY1-<br/>SAT1</i>                      | (3)        |
| <i>dur1,2Δ</i>     | KWN6       | <i>dur1,2Δ::FRT/dur1,2Δ ::FRT</i>                                                   | (4)        |
| A-72               |            | Prototroph (parent of KWN6)                                                         | (4)        |
| <i>ach1Δ</i>       | ACC16      | <i>ach1Δ::hisG/ach1Δ::hisG ura3/ura3<br/>RPS10/rps10::Clp10-URA3/RPS10</i>          | (5)        |
| <i>ach1Δ+ACH1</i>  | ACC17      | <i>ach1Δ::hisG/ach1Δ::hisG ura3/ura3<br/>RPS10/rps10::ACH1-Clp10-URA-ACH1/RPS10</i> | (5)        |
| <i>ato5Δ</i>       | HDC27      | <i>ato5Δ::FRT/ ato5Δ::FRT</i>                                                       | (6)        |
| <i>ato5Δ+ATO5</i>  | HDC30      | <i>ato5Δ::FRT/ ato5Δ::FRT RPS10/rps10::ATO5</i>                                     | (6)        |

**References**

1. **Gillum AM, Tsay EY, Kirsch DR.** 1984. Isolation of the *Candida albicans* gene for orotidine-5'-phosphate decarboxylase by complementation of *S. cerevisiae* *ura3* and *E. coli* *pyrF* mutations. *Mol Gen Genet* **198**:179-182.
2. **Vylkova S, Lorenz MC.** 2014. Modulation of phagosomal pH by *Candida albicans* promotes hyphal morphogenesis and requires Stp2p, a regulator of amino acid transport. *PLoS Pathog* **10**:e1003995.
3. **Miramon P, Lorenz MC.** 2016. The SPS amino acid sensor mediates nutrient acquisition and immune evasion in *Candida albicans*. *Cell Microbiol* **18**:1611-1624.
4. **Ghosh S, Navarathna DH, Roberts DD, Cooper JT, Atkin AL, Petro TM, Nickerson KW.** 2009. Arginine-induced germ tube formation in *Candida albicans* is

- essential for escape from murine macrophage line RAW 264.7. *Infect Immun* **77**:1596-1605.
5. **Carman AJ, Vylkova S, Lorenz MC.** 2008. Role of acetyl coenzyme A synthesis and breakdown in alternative carbon source utilization in *Candida albicans*. *Eukaryot Cell* **7**:1733-1741.
  6. **Danhof HA, Lorenz MC.** 2015. The *Candida albicans* ATO Gene Family Promotes Neutralization of the Macrophage Phagolysosome. *Infect Immun* **83**:4416-4426.

Vylkova and Lorenz, Supplementary Figure 1

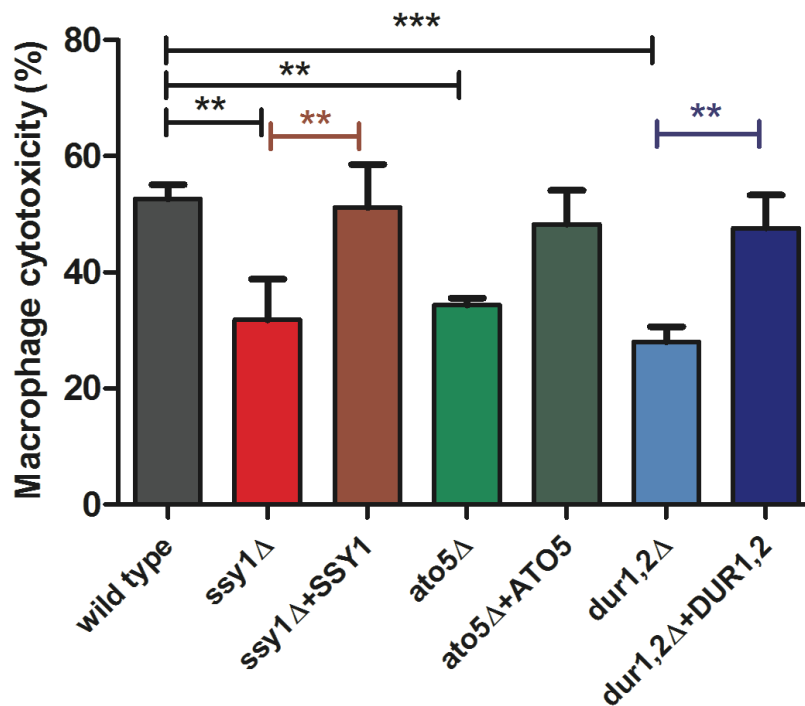

**Fig S1. Alkalinization of the phagosome by *C. albicans* is required for macrophage killing.** *C. albicans* SC5314, *ssy1* $\Delta$ , *dur1,2* $\Delta$ , *ato5* $\Delta$  mutants and their complemented strains were co-cultured with J774A.1 macrophages for 5 hours. Macrophage cytotoxicity was assessed as described in Materials and Methods. Results are reported as mean values  $\pm$  SD from triplicate experiments. \*\*,  $P < 0.001$ .
